# Supplementary material for: Comparison of three aerosol representations of NHM-Chem (v1.0) for the simulations of air quality and climate-relevant variables
Source: Copernicus journal article supplement (doi:10.5194/gmd-2020-229), 2020-10-12
Supplement: Supplementary file [file gmd-2020-229-AC1-supplement.pdf]

Dear anonymous referee #1,

We very much appreciate your constructive comments and your time for RC1. Thanks to your review, our manuscript was substantially improved, especially for clearness of the sentences. All your comments were taken into account in the revised manuscript.

Point-by-point responses to your comments are written in blue in this letter.

With best regards,

Mizuo Kajino

---

[1] The paper by Kajino et al. 2020 primarily compares 3 existing aerosol representation schemes with varying complexity, namely a simple bulk, a 3- and a 5-category method within the newly developed chemical transport model (CTM) NHM-Chem. In a previous version of the paper, one of the key shortcomings was the missing link to the complete description of the model system, or the poor description within respectively. With the general model description paper now being published, the existing study gains in quality and also presents a relevant topic which itself fits to the scope of the journal. The language does not need significant review.

With the general functionality, the technical realizations and differences in aerosol representations being elaborately discussed, an overall synthesis is missing which provides clear statements of the potential of the three themes discussed. Beginning with the heading, it does not come out clearly what is meant by 'air quality' and 'climate-relevant' variables and how that difference is tackled within the study. That aspect should be highlighted better in the introduction and within the discussion/conclusion. The overall quality of the paper has pretty much increased compared to previous versions. The points however which still need further work will be pointed out in the following:

[1] Thank you for the evaluation and comment. We clearly defined these terms in 1. Introduction and 7. Conclusion and discussion (the section name was changed according to RC2 [10]), respectively, as follows:

(Introduction) "In this study, surface concentrations and depositions are referred to as

air quality variables, whereas variables involved in aerosol feedback processes such as optical properties and cloud and ice nucleation properties are referred to as climate-relevant variables.”

(Conclusion and discussion) “The three methods were intercompared for the predictions of air quality and climate-relevant variables. In this study, surface concentrations and depositions are referred to as air quality variables, whereas variables involved in aerosol feedback processes such as optical properties and cloud and ice nucleation properties are referred to as climate-relevant variables.”

*Abstract:*

[2] If online coupling is not done within that study, it should be removed from the abstract. That aspect however is important when discussing the shortcomings and the outlook.

[2] Thank you for your comments. We removed the relevant sentence from the abstract and moved it to the end of the “Conclusion and discussion” section. We also inserted the following sentence in the 2<sup>nd</sup> paragraph of “Conclusion and discussion” section: “(implementation of aerosol feedback processes to NHM-Chem is still ongoing).”

*Introduction:*

[3] Page 2, Line 21: unclear: decrease air concentration

[3] (1<sup>st</sup> paragraph of Introduction) Thank you for pointing this out. The sentence was awkward. If the removal rates of aerosol increase, deposition increases and air concentration decreases. We rephrased the relevant sentences as follows:

“The removal rates of aerosols, which alter atmospheric life time and earth surface contaminations, depend highly on these properties”

[4] 2, 26-31: re-write avoiding repetitions ‘aerosols’

[4] (2<sup>nd</sup> paragraph of Introduction) We avoided repetitions by rephrasing from “properties of aerosols” to “their properties”. If one sentence includes two “aerosols”, the latter was changed to “those”.

[5] 3, 17: are developed; the terms regional climate, air quality and operational forecasting should be explained more detailed, also highlighting how each single aspect has been addressed in the paper

[5] (last paragraph of Introduction) We changed from “developed” to “are developed”. We totally removed the unclear phrase “regional climate” throughout the manuscript and changed it to more concrete expressions such as “aerosol-cloud-radiation processes” or “aerosol feedback process”. The relevant sentences are reorganized as follows:

“The three aerosol representations are developed for the three respective purposes of predictions, aerosol-cloud-radiation interaction processes (or aerosol feedback processes), air quality issues (surface air concentrations of hazardous materials including their depositions), and operational forecasting (real-time forecast of hazardous materials concentrations with high computational efficiency)”

[6] 3,20-25: unclear, whether the bulk and the 5-category schemes have been developed in the course of the study or have been existing before

[6] (last paragraph of Introduction) It has been existing before, since Kajino et al., J. Meteor. Sci. Japan (2019). We modified the relevant sentence from “From the context mentioned above, ... three options for aerosol representations ... are implemented in a model and intercompared in this study” to “From the context mentioned above, ... three options for aerosol representation ... already implemented in a model are intercompared in this study”.

*NHM-Chem:*

[7] 4,11: better model configuration than schemes of the CTM

[7] (3<sup>rd</sup> paragraph of Sect. 2) We changed it.

*Aerosol representation:*

[8] 8,3: unclear: ‘fully solve for’

[8] (5<sup>th</sup> paragraph of Sect. 3) “Fully” meant nucleation, condensation, coagulation, and deposition, but we realized that it is not a general term. We think that “fully” was not needed here and so we modified the sentence as follows: “The 5-category and 3-category methods solve for aerosol microphysical processes by using the ...”.

[9] 8,10: unclear whether data assimilation is done here. That aspect is important when discussing the model’s potential for operational forecast.

[9] (5<sup>th</sup> paragraph of Sect. 3) Sorry for the confusion. Data assimilation is applied for the

operational forecast, but it was not applied for the results presented in the paper because the purpose of the paper is the comparison of aerosol representations. We inserted the following sentence to the relevant paragraph: “It should be noted here that the data assimilation was not applied to the simulations, because the current study focused on variations in the model performances due to the different aerosol representations. The same initial and boundary conditions were used for the all simulations.”

*Setup:*

[10] 11,15: How were the two datasets combined, please specify

[10] (1<sup>st</sup> paragraph of Sect. 4.1) It was described later in the same paragraph. To avoid this confusion the sentence was rephrased to “two half-year CTM simulations were conducted and then combined due to the initialization issue regarding the land surface model”. Please refer to our reply to RC2 [7], which substantially enhanced the clarity of the data handling.

*Model performance:*

[11] In the beginning of the chapter, it has to be clarified which different aspects are considered in terms of the relevant purposes operational forecast, air quality forecast and climate forecast. How are these aspects discussed in that paper? What are the differences between studied processes, variables or even model configuration?

[11] (1<sup>st</sup> paragraph of Sect. 6) Thank you for your valuable comment. In the first paragraph, the terms “operational forecast”, “air quality forecast”, and “climate forecast” are clearly defined with improvements of terms as follows:

“in terms of their relevant purposes, i.e., simulations of variables often used for operational forecast (such as O<sub>3</sub>, mineral dust, and PM<sub>2.5</sub>), simulations of air quality variables (surface concentrations and depositions of pollutants), and simulations of climate-relevant variables (such as AOT, CCN, and ice nucleating particles (INP)), respectively”.

We also added the new paragraph in the end of Sect. 6, which clearly described the objectives of the section as follows:

“The main objectives of this section are itemized as follows: (1) to compare the computational efficiency of the three methods, (2) to quantify the deviations of the

widely used 3-category method and the efficient bulk equilibrium method from the most realistic aerosol representation of NHM-Chem, the 5-category method, and (3) to assess the discrepancy between the simulated and observed variables and how the discrepancy varied depending on the three methods” The similar statement was repeated in the 2<sup>nd</sup> paragraph of Sect. 7 “Conclusion and discussion”.

[12] The R- Values for PM10 are particularly low. Please discuss that aspect in terms of model performance for operational forecast, also highlighting the differences to the performance for PM2.5. It is partly discussed in the text, but more clarity is needed.

[12] *R* values for PM<sub>10</sub> are particularly low, because those are the comparisons of hourly concentrations during the dust events at two stations (totally 69 data). Deviations in durations of simulated and observed dust events caused significant low correlations among them. In contrast, *R* for daily PM<sub>10</sub> for the whole year at all stations were approximately 0.6, as presented in Table 4 of Kajino et al., JMSJ (2019), which was comparable with *R* for daily PM<sub>2.5</sub>. It is clearly stated in the 4<sup>th</sup> paragraph of Sect. 6.2 and to avoid confusion the variable name of PM<sub>10</sub> is changed to PM<sub>10\_D</sub> in the revised manuscript. Time resolution is also added in Table 4. PM<sub>10\_D</sub> is defined in Sect. 5 when it is appeared first time.

The following sentences are inserted in the 4<sup>th</sup> paragraph of Sect. 6.2 of the revised manuscript:

“Table 4 compares the observed and simulated Ext\_D and PM10\_D during the dust events in the month. The R values for Ext\_D and PM10\_D are particularly low, mainly because the values are the comparisons of hourly concentrations during the limited period (totally 69 data). The R values for the daily concentrations of Ext\_D and PM10 at all stations for the whole period are available in Table 4 of Kajino et al. (2019a). The R value for Ext\_D was still low (0.25) but that for PM<sub>10</sub> were 0.57-0.58, comparable with other variables such as PM<sub>2.5</sub> and O<sub>3</sub>.”

Please note that this part was moved to 3<sup>rd</sup> paragraph of Supplement 3, according to RC2 [5].

[13] Figure 3: white areas in left and middle panel (also in Figure 12)?

[13] According to RC2 [3], Fig. 3 was modified so that the topography was depicted under shades. There are no white areas in the new figures. There were no white areas in Fig. 12 (Fig. 11 in the revised manuscript). Areas below the lowest value ( $10 \text{ } 10^1/\text{cm}^3$

for the Fig. 11's case), which appeared white indicating topography height.

[14] 20,8: show simulated medians in Table 4

[14] We added the simulated medians in the table.

[15] 20,11: specify 'remote sites'?

[15] (3<sup>rd</sup> paragraph of Sect. 6.2) We added the stations names, "Rishiri, Sado, Oki, Ogasawara, and Hedo in Fig. 2" as remote island sites and "Happo and Yusuhara in Fig. 2" as rural inland sites. Please note that this part was moved to the 2<sup>nd</sup> paragraph of Supplement 3, according to RC2 [5].

[16] 20,12: What are the key problems in the underestimation of NO<sub>x</sub> here? Problems with the emission dataset or chemical origin? Please further discuss that aspect with regard for using that model system in 'operational mode'. What is the ratio between NO/NO<sub>2</sub> in total NO<sub>x</sub>?

[16] Probably lower correlation, you meant, rather than underestimation because *Sim:Obs* for NO<sub>x</sub> were not very bad, 0.92-0.94. It may be due to the emission datasets, and I personally assumed it is due mainly to the crude resolution which does not resolve the heterogeneity of emission sources. It is basically difficult to simulate primary short-lived (e.g., less than a day) species such as NO<sub>x</sub> by low resolution models. The model calculates horizontal mean concentrations but in reality the concentrations of such species should vary in space. Secondary species such as sulfate and O<sub>3</sub>, or primary long-lived species (longer than a day) such as SO<sub>2</sub> are relatively easier for the crude resolution models. By the way, NO/NO<sub>x</sub> ratio in emission was assumed 0.9 in the simulation. We do not know if it is the perfect ratio, but this resulted in good model performance in terms of NO<sub>x</sub> and O<sub>3</sub> concentrations in Japan.

The relevant sentence in the 3<sup>rd</sup> paragraph of Sect. 6.2 was modified accordingly as follows:

"Low correlations of NO<sub>x</sub> were obtained probably because it is difficult to simulate primary short-lived species for the crude resolution models. The unresolvable heterogeneity of emission sources near the sites degraded the model performance of the primary species results more than they did for the secondary species such as O<sub>3</sub>."

Please note that this part was moved to 2<sup>nd</sup> paragraph of Supplement 3, according to RC2.

[17] 24,20: discuss the large spread 20-100%

[17] The causes of the large spread were already discussed in the original manuscript, but it was not clear. The 5<sup>th</sup> paragraph of Sect. 6.2 was extensively reorganized in the revised manuscript, which is simply summarized as follows:

- Overestimation of  $PM_{2.5}$  and  $PM_{2.5}$ (piled-up) of Bulk against those of 5-category and 3-category methods was due to the neglect of nitrate in dust by Bulk.
- Overestimation of  $PM_{2.5}$  of 3-category against that of 5-category was due to the unrealistic assumption of completely internal mixture of sea-salt and dust particles.

The both caused the large spread of 20-100%. Still, however, the statistical scores for the simulation-observation comparison were not different among the methods. So, we concluded that the bulk method is feasible for the operational forecast of  $PM_{2.5}$ , because the computational efficiency attained by the bulk method did not significantly deteriorate the model performance.

[18] 26,16: Why is that aspect particularly pronounced over sea areas? Figure 6: Why is 'Bulk' so much higher over the sea?

[18] Thank you for the good question. The contrast is prominent between land and ocean but there is also a contrast over the ocean in the top-left panel of Fig. 6 (bulk/5-ctg in spring), near from the continent (Yellow Sea and Sea of Japan) and far from the continent (East China Sea and Northwest Pacific). So, we had thought that the following mechanism is primary important: Slower deposition (of Bulk over the continent and ocean near the coast) caused longer lifetime, which in turn caused larger concentration and deposition (of Bulk) over the far downwind regions. However, it may not be true because T- $NO_3^-$  concentration of Bulk is smaller than that of Bulk in Yellow Sea and Sea of Japan. If the difference is due to the lifetime effect, surface concentration of Bulk should be larger. We came to another but very simple conclusion that the difference is due to instantaneous equilibrium assumed in Bulk. The most prominent composition of T- $NO_3^-$  over the red shaded areas in the left panels of Fig. 6 was seasalt- $NO_3$ . In the presence of abundant sea-salt,  $HNO_3$  quickly reacts with sea-salt in Bulk, while  $HNO_3$  reacts gradually with sea-salt in 5-ctg. Consequently,  $NO_3$  fractions of sea-salt mass of Bulk are larger than those of 5-ctg, as shown in the panel below (this is in spring). This caused larger  $NO_3$  deposition (mostly composed of sea-salt  $NO_3$ ) predicted by Bulk in the regions.

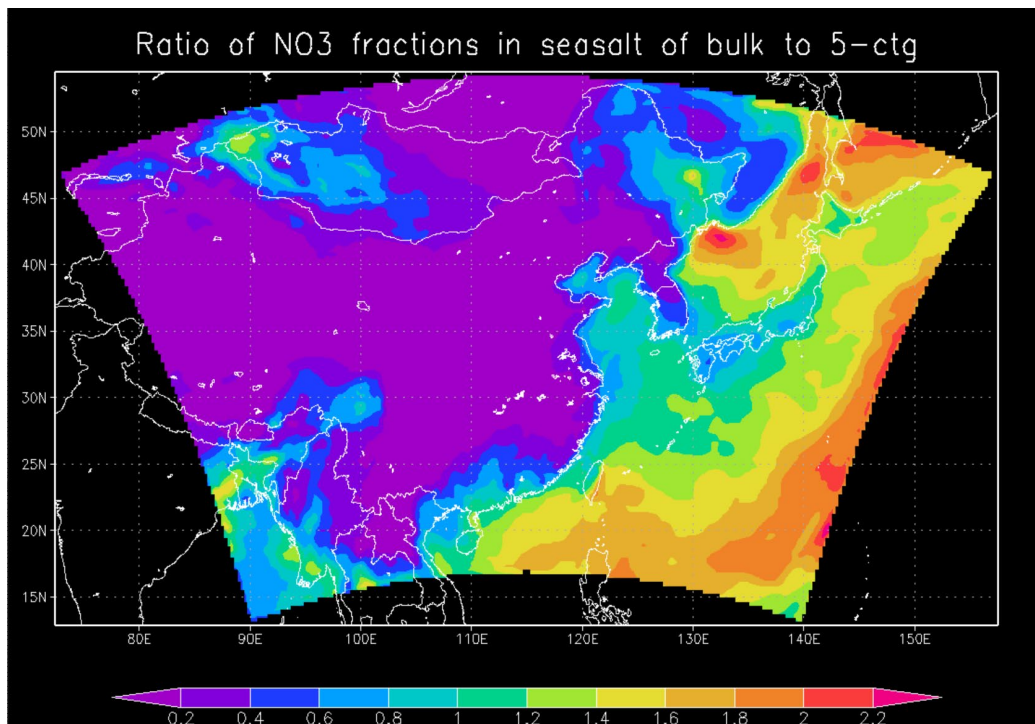

The relevant sentences (in the 2<sup>nd</sup> paragraph of Sect. 6.3 in the revised manuscript) were reorganized accordingly as follows:

“This difference is mainly due to difference in the gas-aerosol partitioning of T-NO<sub>3</sub><sup>-</sup>, because the differences in nss-SO<sub>4</sub><sup>2-</sup> and NH<sub>4</sub><sup>+</sup> simulated using different methods were less significant. The dry deposition of T-NO<sub>3</sub><sup>-</sup> of the bulk method was smaller over land because no coarse mode NO<sub>3</sub><sup>-</sup> was formed over land, where its dry deposition velocity is much larger than that of submicron NO<sub>3</sub><sup>-</sup>. Consequently, compared to the other two methods, the total (i.e., nss-SO<sub>4</sub><sup>2-</sup>, T-NH<sub>4</sub><sup>+</sup>, plus T-NO<sub>3</sub><sup>-</sup>) dry deposition flux of the bulk method over land was smaller. On the other hand, the total dry deposition of the bulk method is larger over the ocean, where NO<sub>3</sub><sup>-</sup> mixed with sea salt was the major component of T-NO<sub>3</sub><sup>-</sup>. Because the bulk method assumes instantaneous equilibrium, HNO<sub>3</sub> reacts immediately with sea salt particles, whereas HNO<sub>3</sub> gradually reacts with sea salt in the 5-category method. Consequently, NO<sub>3</sub><sup>-</sup> fractions of sea salt mass (as well as T-NO<sub>3</sub><sup>-</sup> concentrations) predicted by the bulk method are larger than those for the 5-category method, which caused larger deposition amounts of T-NO<sub>3</sub><sup>-</sup> (as well as the total dry deposition) predicted by the bulk method over the ocean areas.”

[19] 27,4: reason for patchiness?

[19] (3<sup>rd</sup> paragraph of Sect. 6.3) Wet deposition is patchier than dry deposition because



horizontal distribution of precipitation is patchy, as we added in the revised manuscript.

*Conclusion:*

[20] As mentioned earlier, the conclusion is still missing a clear synthesis, which in places also results from missing details at various places in the manuscript. The authors are encouraged to address the following points:

P 41, Line 21: How was the operational forecast quality assessed? It is unclear if the term 'operational forecast' simply relates to the selected variables or also includes a change in the model setup (how is DA addressed?)

[20] The bulk method is faster than the other methods. If the results of fast bulk method are not far from those of the 5-category method, as a benchmark of NHM-Chem, it is successful. It is also indicated that the bulk method is eligible for operational forecasting for PM<sub>2.5</sub>, because the computational efficiency did not significantly deteriorate the model performances in terms of the predictions of PM<sub>2.5</sub> surface concentrations. Of course, observation data are still not close from the results predicted by all aerosol methods. The gap between the observation and all simulations can be filled by the data assimilation or the guidance (post-process of statistical bias correction) or by the further model development. The sentences were modified accordingly. Please see the 3<sup>rd</sup> paragraph of Sect. 7 "Conclusion and discussion", in the revised manuscript.

Regarding "DA", in the previous manuscript, we had the sentence "The initial and boundary conditions should be improved before model formulation". The improvement of initial condition implicitly indicated "DA". We deleted this sentence anyway in the same paragraph, because we found it was awkward.

[21] P 41, Line 24: How exactly should the initial and boundary conditions be improved?

[21] Sorry for the confusion. We deleted the sentence which was awkward, as we replied in the previous comment [20].

[22] P 41, Line 25: Referring to your model results: where are the biggest shortcomings?

[22] We deleted the sentence, but thank you for your good question. We dare to say everything. However, the model evaluation is the only scope of the current paper, so the shortcoming is performance of the forward model in this manuscript. DA (to improve initial and boundary conditions) is out of the scope, but there are enough many DA

techniques to overcome the initial and boundary condition issues, and in addition there are statistical bias correction techniques including machine learning.

[23] P42, Line 24: See point above. Summarize dominant reasons for discrepancies.

[23] If your question is regarding the above point, “initial condition, boundary condition, or model itself?”, the answer is model itself, as previously replied (in [21] and [22], and the manuscript was modified accordingly). In the model, we still don’t know which are the dominant reasons. In order to get the dominant reasons, we will perform further evaluations. Accordingly, we modified the relevant sentences as follows:

“There are still large discrepancies between the simulation and observation results, but the reasons are still unclear. In order to identify the reasons and improve NHM-Chem, further evaluations should be made in the near future with respect to ...”

[24] P42, Line 31: what is meant by timely and properly reflected? What are the future plans? Despite the shortcomings; what are the key benefit of the current configuration presented in this paper? What should be the core areas of future development?

[24] Timely meant immediately. Properly meant by only selecting good methods. We have two core R&D strategies, aerosol feedback and new aerosol schemes. We plan to do both, but in fact, aerosol feedback has been implemented (we haven’t written a paper on it, yet). So, the future plan is to implement advanced schemes in new particle formation, secondary organics chemistry, and ice nucleation parameterizations based on recent knowledges and recent techniques. Despite the shortcomings, the key benefit of the current configuration is the comparisons of two method, fast bulk equilibrium method and accurate 5-category method, against the 3-category method, which is widely used in the air quality modeling community.

To be more specific and concrete, the last paragraph of Conclusion was separated into three and the latter two were the future plans.
